# Supplementary material
Source: publisher site journal article supplement (https://www.dovepress.com/get_supplementary_file.php?f=283591.docx)
Supplement: Supplementary file 1 [file get_supplementary_file.php]

Table S1 Detailed patient characteristics

|  |  | Sex | Number of patients | Age*1 | BMI*1 | HbA1c*1 (%) | Retinopathy*2 (%) | Nephropathy*3 (%) | DM duration*1 (years) |
| --- | --- | --- | --- | --- | --- | --- | --- | --- | --- |
| Diabetes | Type 1*4 | Male | 16 | 59.4 ± 9.5 | 22.1 ± 2.0 | 7.1 ± 1.1 | 43.8 | 26.7 | 16.0 ± 12.3 |
|  | Female | 15 | 61.0 ± 15.1 | 21.9 ± 3.9 | 7.7 ± 1.0 | 33.3 | 20.0 | 18.2 ± 14.9 |
|  | TYPE 2*4 | Male | 238 | 65.3 ± 11.2 | 25.1 ± 4.1 | 7.2 ± 1.0 | 31.5 | 47.2 | 17.2 ± 11.0 |
|  | Female | 125 | 64.4 ± 12.4 | 25.8 ± 5.0 | 7.6 ± 1.1 | 34.4 | 41.18 | 16.3 ± 10.7 |
| Non-diabetes | Dyslipidemia, hypertension, or others*5 | Male | 36 | 57.2 ± 12.7 | 24.5 ± 3.7 |  |  |  |  |
|  | Female | 29 | 60.1 ± 12.5 | 23.3 ± 3.0 |  |  |  |  |
|  | Thyroid disease*6 | Male | 18 | 61.9 ± 14.7 | 24.3 ± 3.6 |  |  |  |  |
|  | Female | 97 | 53.9 ± 14.0 | 22.7 ± 3.4 |  |  |  |  |
|  | Pituitary, adrenal, or others*7 | Male | 10 | 67.0 ± 12.2 | 23.1 ± 2.2 |  |  |  |  |
|  | Female | 8 | 61.9 ± 12.7 | 25.0 ± 6.9 |  |  |  |  |

*1Values are represented as mean ± standard deviation.

*2Retinopathy includes simple diabetic retinopathy, preproliferative diabetic retinopathy, proliferative diabetic retinopathy, and panretinal photocoagulation.

*3Nephropathy includes a urinary albumin excretion >30 mg/g creatinine or an estimated glomerular filtration rate <30 mL/min/1.73 m2.

*4Patients defined as having type 1 diabetes mellitus consisted of those with acute onset insulin-dependent diabetes or those who had positive anti-glutamic acid decarboxylase (anti-GAD) or anti-islet antigen-2 (IA-2) antibodies. All other patients were defined as having type 2 diabetes.

*5Including hypertension, dyslipidemia, impaired glucose tolerance, and simple obesity.

*6Including Graves’ disease, Hashimoto thyroiditis, and adenomatous goiter.

*7Including hypopituitarism, diabetes insipidus, adrenal insufficiency, adrenal incidentaloma, primary aldosteronism, hypoparathyroidism, and gonadal dysfunction.

*5,*6,*7All diseases were stable with or without medical treatment.

Table S2 Survey questionnaires

|  | Construct | Text |
| --- | --- | --- |
| **Q1** | General risk loving, weather | Suppose it is not raining when you go out. At what chance of rain would you take your umbrella or some other measure for rain? Please circle the number closest to your answer from the following choices.  0%, 10%, 20%, 30%, 40%, 50%, 60%, 70%, 80%, 90%, 100% |
| **Q2** | General risk averse, travel | When you have a seat reservation for a train, how early (in minutes) do you usually arrive at the station? Please circle the number closest to your answer from the following choices.  3 min, 5 min, 7 min, 10 min, 15 min, 20 min, 25 min, 30 min,  35 min, 40 min, 45 min, 50 min, 60 min, or more |
| **Q3** | Time to spare | Are you so busy as to feel rushed? Please circle the response that most closely matches your answer from the following choices.  1. I feel very rushed 2. I feel somewhat rushed  3. I cannot say either way  4. I somewhat have time to spare 5. I have plenty of time to spare |
| **Q4** | Sleeping hours | How many hours do you sleep per day on average?  About_______ hours |
| **Q5** | Sleep enough | Do you get enough sleep? Please circle the response that most closely matches your answer from the following choices.  1. Never enough 2. Not quite enough 3. Cannot say either way 4. Nearly enough 5. More than enough |
| **Q6** | Procrastination, childhood | Thinking back to when you were a child and you were given an assignment during school vacation, how early did you usually finish up the assignment?  1. I tended to get it done early, before the due date.  2. I worked on it daily, up until the due date.  3. I tended to get it done toward the end. |
| **Q7** | Procrastination,  now | Thinking about yourself now, if you were given an assignment during school vacation, how early would you finish up the assignment?  1. I would get it done rather early, before the due date.  2. I would work on it daily, up until the due date.  3. I would get it done rather toward the end. |
| **Q8** | Acceptance of medical uncertainty | A doctor tells you that the effectiveness of the medicine they are prescribing can vary among individuals and that it might not work for your ailment. Would this explanation be sufficient for you?  1. Yes 2. Probably 3. Not sure 4. Probably not 5. No |
| **Q9** | Average spending on medical care | On average, how much money do you spend on medical treatments every month?  Monthly average: yen |
| **Q10** | Subjective risk estimation for cardiovascular disease (CVD) | Out of 100 people including yourself, how many of them would have to have a heart attack or stroke within 10 years to make you believe that you will also have a heart attack or stroke  people out of 100 |
| **Q11** | Willingness to pay for a medicine reducing disease risk | Imagine that half of the 100 people including yourself have a heart attack or stroke within 10 years. A certain type of medicine can reduce that number to 25. How much would you pay every month to continue taking that medicine?  I would pay up to yen every month just for that medicine |
| **Q12** | Lottery,  risk taker | Shown in Figure 2 |
| **Q13** | Insurance,  risk averse | Shown in Figure 2 |
| **Q14** | Educational level  (total number of years in education) | Please circle your highest academic qualification from the following choices.   1. Junior high school (9 years) 2. High school (12 years) 3. Vocational college (13–15 years) 4. Junior college/technical college (14–15 years) 5. University (16 years) 6. Graduate school (18 years or more) |
| **Q15** | Job status | Please tell us about your work.  Circle 1 if you have worked to earn an income during the past month or circle 2 if you did not work at all.  1. Worked 2. Did not work |
| **Q16** | Savings | Do you currently have any savings? Please circle the option that most closely matches your situation from the following choices.  1. I do not have any savings. 2. My savings have increased.  3. My savings have not changed. 4. My savings have decreased. |
| **Q17** | Economic status | How would you classify your current financial situation as a whole? Please circle the answer that most closely matches your situation from the following choices.  1. Very difficult 2. Somewhat difficult 3. Normal  4. Somewhat affluent 5.Very affluent |

Table S3 Logistic regression model for irrational responses to Q13 (insurance)

| Parameter | Estimate | Standard error | Chi-squared value | p-value |
| --- | --- | --- | --- | --- |
| Age | 0.084 | 0.013 | 37.83 | <.001* |
| Retinopathy (+) | 0.343 | 0.129 | 7 | 0.008* |
| Educational level | −0.205 | 0.087 | 5.5 | 0.019* |

Notes: 394 patients with diabetes with or without retinopathy were included. The dependent variable is irrational choices. Retinopathy (+) includes simple diabetic retinopathy, preproliferative diabetic retinopathy, proliferative diabetic retinopathy, and panretinal photocoagulation. Educational levels were analyzed as continuous variable: junior high school (9 years) = 1, high school (12 years) = 2, vocational college (13–15 years) = 3, junior college/technical college (14–15 years) = 4, university (16 years) = 5, and graduate school (18 years or more) = 6. *p < 0.05.

Table S4 Logistic regression model for irrational responses to Q12 (lottery)

| Parameter | Estimate | Standard error | Chi-squared value | p-value |
| --- | --- | --- | --- | --- |
| Age | 0.083 | 0.014 | 32.47 | <.001* |
| Retinopathy (+) | 0.294 | 0.135 | 4.73 | 0.029* |
| Educational level | −0.161 | 0.091 | 3.13 | 0.077 |

Notes: 394 patients with diabetes with or without retinopathy were included. The dependent variable is irrational choices. Retinopathy (+) includes simple diabetic retinopathy, preproliferative diabetic retinopathy, proliferative diabetic retinopathy, and panretinal photocoagulation. Educational levels were analyzed as continuous variable: junior high school (9 years) = 1, high school (12 years) = 2, vocational college (13–15 years) = 3, junior college/technical college (14–15 years) = 4, university (16 years) = 5, and graduate school (18 years or more) = 6. *p < 0.05.

Table S5 Logistic regression model for irrational responses to Q13 (insurance)

| Parameter | Estimate | Standard error | Chi-squared value | p-value |
| --- | --- | --- | --- | --- |
| Age | 0.075 | 0.013 | 32.68 | <.0001* |
| Non-DM vs. DM retinopathy (-) | −0.101 | 0.138 | 0.54 | 0.462 |
| Educational level | −0.241 | 0.092 | 6.81 | 0.009* |

Notes: 198 patients without diabetes and 264 patients with diabetes without retinopathy were included. The dependent variable is irrational choices. Educational levels were analyzed as continuous variable: junior high school (9 years) = 1, high school (12 years) = 2, vocational college (13–15 years) = 3, junior college/technical college (14-15 years) = 4, university (16 years) = 5, and graduate school (18 years or more) = 6. *p < 0.05.

Table S6 Logistic regression model for irrational responses to Q12 (lottery)

| Parameter | Estimate | Standard error | Chi-squared value | p-value |
| --- | --- | --- | --- | --- |
| Age | 0.073 | 0.013 | 29.9 | <.0001* |
| Non-DM vs. DM retinopathy (-) | 0.029 | 0.141 | 0.04 | 0.836 |
| Educational level | -0.166 | 0.094 | 3.14 | 0.076 |

Notes: 198 patients without diabetes and 264 patients with diabetes without retinopathy were included. The dependent variable is irrational choices. Educational levels were analyzed as continuous variable: junior high school (9 years) = 1, high school (12 years) = 2, vocational college (13–15 years) = 3, junior college/technical college (14–15 years) = 4, university (16 years) = 5, and graduate school (18 years or more) = 6. *p < 0.05.
